# Supplementary material for: CD73 complexes with emmprin to regulate MMP-2 production from co-cultured sarcoma cells and fibroblasts
Source: PubMed Central journal article supplement (PMC6739984; doi:10.1186/s12885-019-6127-x), 2019-09-12

**A**

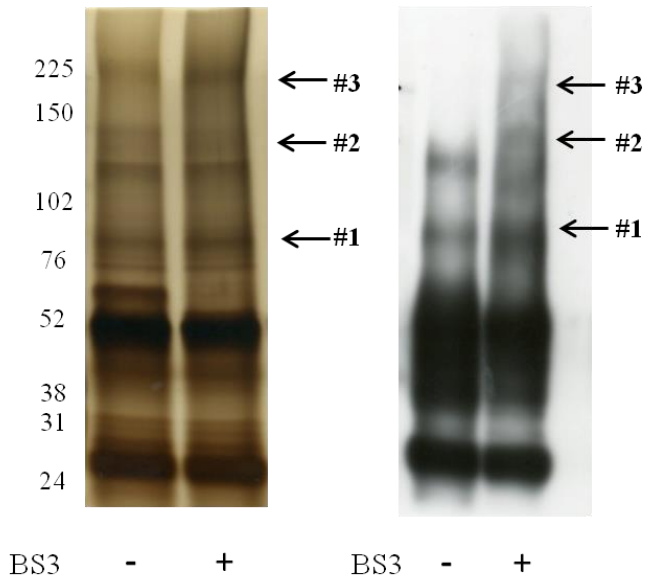

**B**

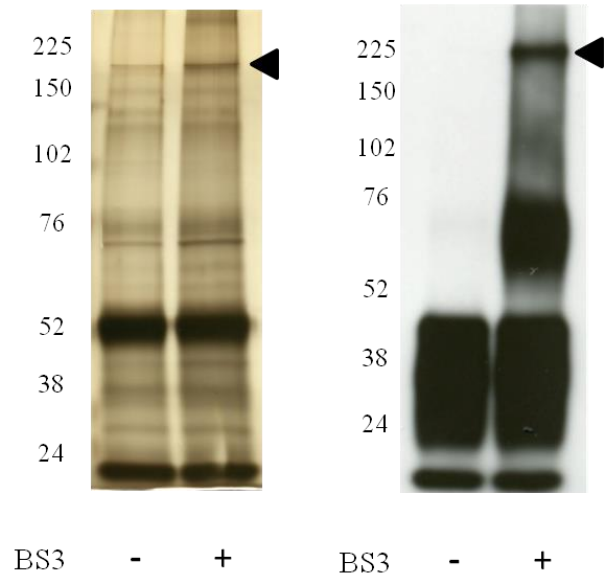

Supplement: 12885_2019_6127_MOESM1_ESM.pdf [file 12885_2019_6127_MOESM1_ESM.pdf]
