# Supplementary material for: CD73 complexes with emmprin to regulate MMP-2 production from co-cultured sarcoma cells and fibroblasts
Source: PubMed Central journal article supplement (PMC6739984; doi:10.1186/s12885-019-6127-x), 2019-09-12
Supplement: 12885_2019_6127_MOESM2_ESM.pdf [file 12885_2019_6127_MOESM2_ESM.pdf]

**IB: Emmprin**

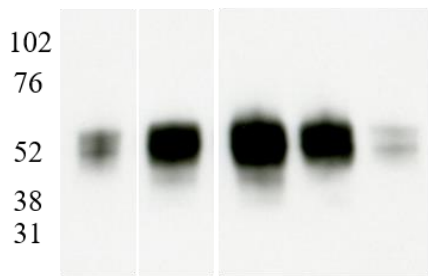

|                      |   |   |   |   |   |
|----------------------|---|---|---|---|---|
| <b>fibroblast</b>    | + | - | + | + | + |
| <b>tumor cell</b>    | - | + | + | + | + |
| <b>control siRNA</b> | - | - | - | + | - |
| <b>emmprin siRNA</b> | - | - | - | - | + |

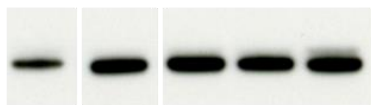

**$\alpha$ -tubulin**

**IB: MMP-2**

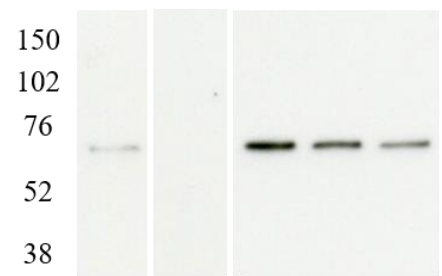

|                      |   |   |   |   |   |
|----------------------|---|---|---|---|---|
| <b>fibroblast</b>    | + | - | + | + | + |
| <b>tumor cell</b>    | - | + | + | + | + |
| <b>control siRNA</b> | - | - | - | + | - |
| <b>emmprin siRNA</b> | - | - | - | - | + |
