# Supplementary material for: CD73 complexes with emmprin to regulate MMP-2 production from co-cultured sarcoma cells and fibroblasts
Source: PubMed Central journal article supplement (PMC6739984; doi:10.1186/s12885-019-6127-x), 2019-09-12
Supplement: 12885_2019_6127_MOESM5_ESM.pdf [file 12885_2019_6127_MOESM5_ESM.pdf]

**A**

**Zymography**

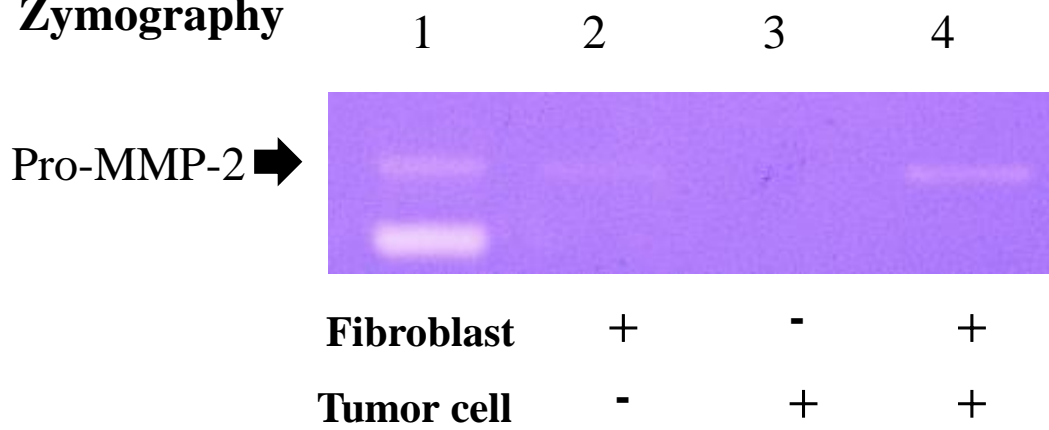

**B**

**IB: MT1-MMP**

(kDa)

150

102

76

52

38

24

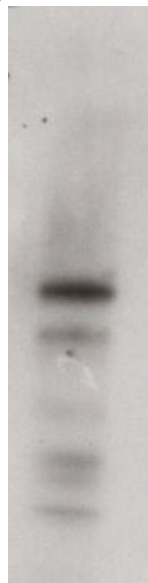

**Tumor cell**
