# Supplementary material for: CD73 complexes with emmprin to regulate MMP-2 production from co-cultured sarcoma cells and fibroblasts
Source: PubMed Central journal article supplement (PMC6739984; doi:10.1186/s12885-019-6127-x), 2019-09-12
Supplement: 12885_2019_6127_MOESM6_ESM.pdf [file 12885_2019_6127_MOESM6_ESM.pdf]

|    | age | location | tumor cells |      | stromal cells |              |
|----|-----|----------|-------------|------|---------------|--------------|
|    |     |          | Emmprin     | CD73 | CD73-close    | CD73-distant |
| 1  | 33  | thigh    | 3+          | 3+   | 2+            | 2+           |
| 2  | 34  | forearm  | 2+          | 3+   | 2+            | 2+           |
| 3  | 65  | vulva    | 3+          | 3+   | 2+            | 1+           |
| 4  | 35  | thigh    | 2+          | 3+   | 2+            | 2+           |
| 5  | 33  | arm      | 3+          | 3+   | 3+            | 3+           |
| 6  | 68  | forearm  | 3+          | 3+   | 3+            | 2+           |
| 7  | 34  | thigh    | 2+          | 3+   | 3+            | 3+           |
| 8  | 61  | shoulder | 2+          | 3+   | 3+            | 3+           |
| 9  | 81  | vulva    | 2+          | 3+   | 3+            | 3+           |
| 10 | 22  | upperarm | 3+          | 3+   | 2+            | 1+           |
